# Supplementary material for: Exploiting metabolic vulnerabilities after anti-VEGF antibody therapy in ovarian cancer
Source: PubMed Central journal article supplement — iScience. 2023 Jan 19;26(2):106020. doi: 10.1016/j.isci.2023.106020 (PMC9941132; doi:10.1016/j.isci.2023.106020), 2023-01-19
Supplement: mmc1.pdf [file mmc1.pdf]

## **Supplemental information**

### **Exploiting metabolic vulnerabilities**

**after anti-VEGF antibody**

**therapy in ovarian cancer**

**Deanna Glassman, Mark S. Kim, Meredith Spradlin, Sunil Badal, Mana Taki, Pratip Bhattacharya, Prasanta Dutta, Charles V. Kingsley, Katherine I. Foster, Olamide Animasahun, Jin Heon Jeon, Abhinav Achreja, Anusha Jayaraman, Praveen Kumar, Minal Nenwani, Fulei Wuchu, Emine Bayraktar, Yutuan Wu, Elaine Stur, Lingegowda Mangala, Sanghoon Lee, Timothy A. Yap, Shannon N. Westin, Livia S. Eberlin, Deepak Nagrath, and Anil K. Sood**

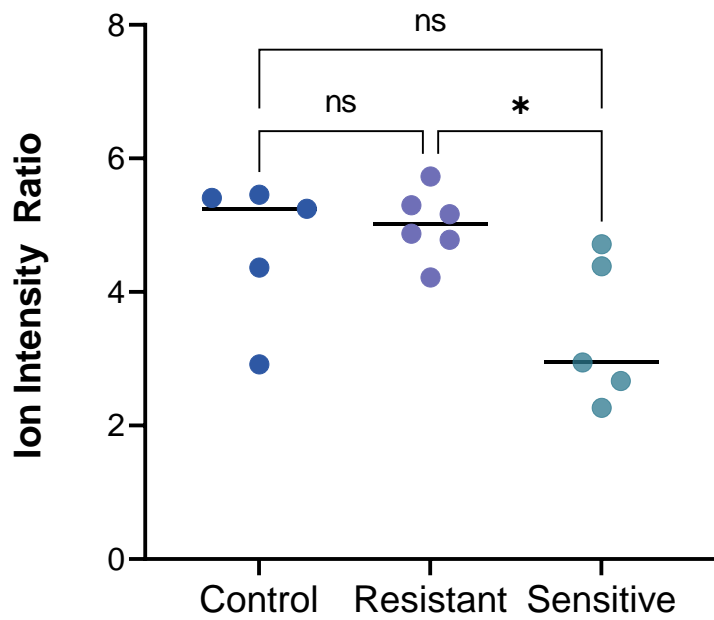

**Figure S1.** Normalized ion abundance comparing the ion intensity ratio of glutamate to glutamine within tumor tissues from an SKOV3ip1 ovarian cancer mouse model receiving no treatment (control) vs those that were either resistant or sensitive to AVA (bevacizumab) therapy, as monitored by in vitro imaging analysis. Related to Figure 2D. Statistical significance was determined by Tukey's HSD post hoc test, \*  $p < 0.05$ .

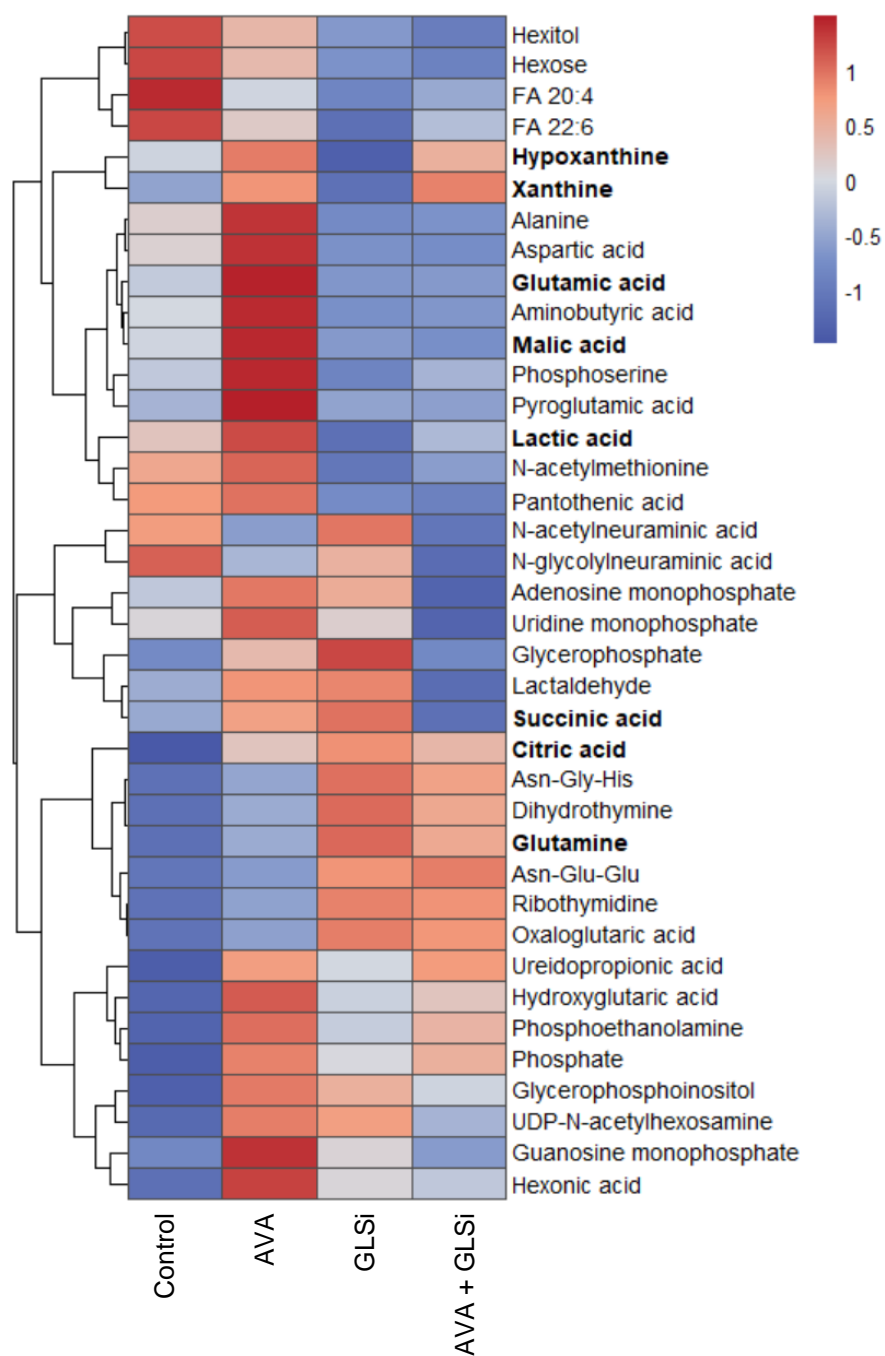

**Figure S2.** Intensity heat map for metabolites selected by SAM as significantly altered among SKOV3ip1 tumors treated with a vehicle control, AVA, GLSi, or AVA+GLSi (FDR < 5%) identified by DESI-MS imaging. Related to Figure 6. Features were clustered using a Euclidean-distance formula according to the average signal intensity of the corresponding  $m/z$  value measured from tumor-specific regions. The color scale reflects z-score standard deviations from the mean relative abundance measured for each ion. For fatty acid (FA) species, X:Y indicates the number of carbons and double bonds, respectively.

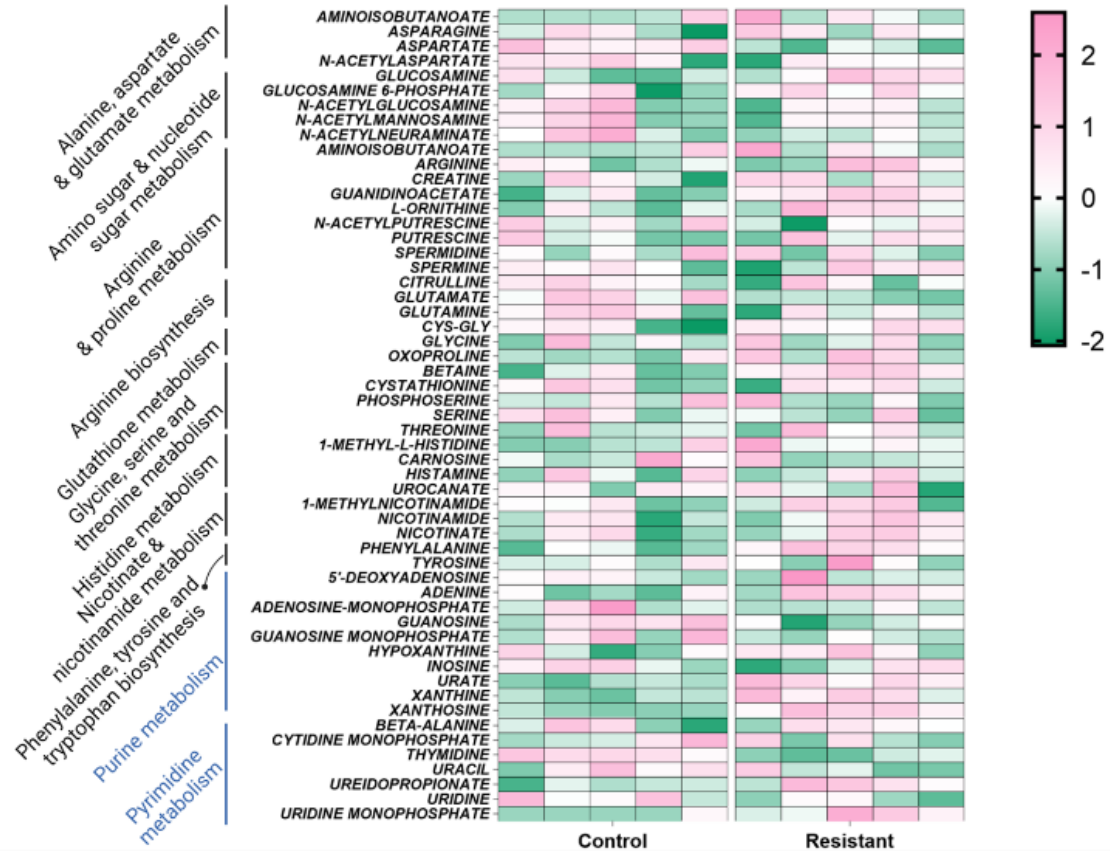

**Figure S3.** Heat map of altered metabolic pathways in control vs bevacizumab resistant tumor tissues. Related to Figure 2B. Purine and pyrimidine metabolism highlighted in blue on y axis. FDR < 0.05 with scale bar indicated log fold change  $|-2 \text{ to } +2|$ .

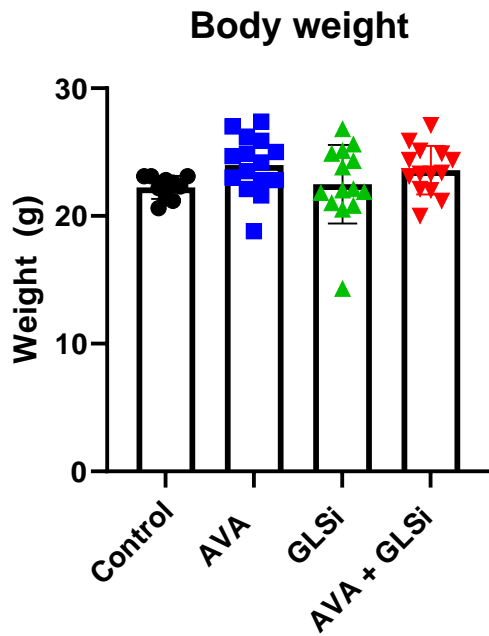

**Figure S4.** Body weights of SKOV3ip1 mouse model after randomization and treatment into one of four groups: control, bevacizumab (AVA), GLSi, or combination of bevacizumab plus GLSi therapy (AVA + GLSi);  $P = 0.16$ . Related to Figure 5.

**Supplementary Table 1:** Metabolite species selected by SAM as significantly altered among SKOV3 tumors treated with a vehicle control, Bevacuzamib, GLSi, or a combination of Bevacuzamib and GLSi (FDR < 5%) identified using DESI-MS imaging. Tentative attributions were assigned for each *m/z* value based on high mass accuracy and MS/MS measurements. For lipid species, X:Y refers to the fatty acid carbon chain length and number of double bonds, respectively.

| Measured <i>m/z</i>      | Tentative Attribution              | Adduct   | Proposed Formula                                                              | Exact <i>m/z</i> | Mass Error (ppm) | SAM Score (d) | q-value |
|--------------------------|------------------------------------|----------|-------------------------------------------------------------------------------|------------------|------------------|---------------|---------|
| <b>Small Metabolites</b> |                                    |          |                                                                               |                  |                  |               |         |
| 73.028                   | Lactaldehyde                       | [M-H]-   | C <sub>3</sub> H <sub>5</sub> O <sub>2</sub>                                  | 73.0295          | -17.8            | 0.70          | 0.0186  |
| 88.039                   | Alanine                            | [M-H]-   | C <sub>3</sub> H <sub>6</sub> NO <sub>2</sub>                                 | 88.0404          | -15.9            | 1.29          | 0.0000  |
| 89.023                   | Lactic acid                        | [M-H]-   | C <sub>3</sub> H <sub>5</sub> O <sub>3</sub>                                  | 89.0244          | -15.5            | 0.77          | 0.0115  |
| 96.968                   | Phosphoric acid                    | [M-H]-   | H <sub>2</sub> O <sub>4</sub> P                                               | 96.9696          | -14.1            | 0.65          | 0.0390  |
| 102.055                  | Aminobutyric acid                  | [M-H]-   | C <sub>4</sub> H <sub>8</sub> NO <sub>2</sub>                                 | 102.0561         | -13.8            | 1.65          | 0.0000  |
| 117.018                  | Succinic acid                      | [M-H]-   | C <sub>4</sub> H <sub>5</sub> O <sub>4</sub>                                  | 117.0193         | -10.7            | 0.81          | 0.0000  |
| 127.050                  | Dihydrothymine                     | [M-H]-   | C <sub>5</sub> H <sub>7</sub> N <sub>2</sub> O <sub>2</sub>                   | 127.0513         | -9.6             | 1.77          | 0.0000  |
| 128.034                  | Pyroglutamic acid                  | [M-H]-   | C <sub>5</sub> H <sub>6</sub> NO <sub>3</sub>                                 | 128.0353         | -9.4             | 0.79          | 0.0000  |
| 131.045                  | Asparagine<br>Ureidopropionic acid | [M-H]-   | C <sub>4</sub> H <sub>7</sub> N <sub>2</sub> O <sub>3</sub>                   | 131.0462         | -9.1             | 0.74          | 0.0186  |
| 132.029                  | Aspartic acid                      | [M-H]-   | C <sub>4</sub> H <sub>6</sub> NO <sub>4</sub>                                 | 132.0302         | -8.8             | 1.08          | 0.0000  |
| 133.013                  | Malic acid                         | [M-H]-   | C <sub>4</sub> H <sub>5</sub> O <sub>5</sub>                                  | 133.0143         | -9.4             | 1.14          | 0.0000  |
| 135.030                  | Hypoxanthine                       | [M-H]-   | C <sub>5</sub> H <sub>3</sub> N <sub>4</sub> O                                | 135.0312         | -7.4             | 0.61          | 0.0459  |
| 140.011                  | Phosphoethanolamine                | [M-H]-   | C <sub>2</sub> H <sub>7</sub> NO <sub>4</sub> P                               | 140.0118         | -8.2             | 1.03          | 0.0000  |
| 145.061                  | Glutamine                          | [M-H]-   | C <sub>5</sub> H <sub>9</sub> N <sub>2</sub> O <sub>3</sub>                   | 145.0619         | -7.9             | 1.96          | 0.0000  |
| 146.045                  | Glutamic acid                      | [M-H]-   | C <sub>5</sub> H <sub>8</sub> NO <sub>4</sub>                                 | 146.0459         | -7.8             | 1.58          | 0.0000  |
| 147.029                  | Hydroxyglutaric acid               | [M-H]-   | C <sub>5</sub> H <sub>7</sub> O <sub>5</sub>                                  | 147.0299         | -7.6             | 0.61          | 0.0459  |
| 151.025                  | Xanthine                           | [M-H]-   | C <sub>5</sub> H <sub>3</sub> N <sub>4</sub> O <sub>2</sub>                   | 151.0262         | -7.5             | 0.65          | 0.0390  |
| 171.006                  | Glycerophosphate                   | [M-H]-   | C <sub>3</sub> H <sub>8</sub> O <sub>6</sub> P                                | 171.0064         | -5.3             | 0.76          | 0.0115  |
| 181.071                  | Hexitol                            | [M-H]-   | C <sub>6</sub> H <sub>13</sub> O <sub>6</sub>                                 | 181.0718         | -4.5             | 0.70          | 0.0186  |
| 184.001                  | Phosphoserine                      | [M-H]-   | C <sub>3</sub> H <sub>7</sub> NO <sub>6</sub> P                               | 184.0017         | -4.4             | 0.65          | 0.0390  |
| 190.054                  | N-Acetylmethionine                 | [M-H]-   | C <sub>7</sub> H <sub>12</sub> NO <sub>3</sub> S                              | 190.0543         | -3.7             | 0.60          | 0.0459  |
| 191.019                  | Citric acid                        | [M-H]-   | C <sub>6</sub> H <sub>7</sub> O <sub>7</sub>                                  | 191.0197         | -3.8             | 0.90          | 0.0000  |
| 195.050                  | Hexonic acid                       | [M-H]-   | C <sub>6</sub> H <sub>11</sub> O <sub>7</sub>                                 | 195.051          | -3.0             | 1.07          | 0.0000  |
| 203.020                  | Oxaloglutaric acid                 | [M-H]-   | C <sub>7</sub> H <sub>7</sub> O <sub>7</sub>                                  | 203.0197         | 1.0              | 1.08          | 0.0000  |
| 215.032                  | Hexose                             | [M+Cl]-  | C <sub>6</sub> H <sub>12</sub> O <sub>6</sub> Cl                              | 215.0350         | -2.3             | 0.63          | 0.0459  |
| 217.048                  | Hexitol                            | [M+Cl]-  | C <sub>6</sub> H <sub>14</sub> O <sub>6</sub> Cl                              | 217.0484         | -3.4             | 0.82          | 0.0000  |
| 218.103                  | Pantothenic acid                   | [M-H]-   | C <sub>9</sub> H <sub>16</sub> NO <sub>5</sub>                                | 218.1034         | -2.0             | 0.97          | 0.0000  |
| 219.978                  | Phosphoserine                      | [M+Cl]-  | C <sub>3</sub> H <sub>8</sub> NO <sub>6</sub> PCl                             | 219.9783         | -1.5             | 0.81          | 0.0000  |
| 257.076                  | Methyluridine or<br>Ribothymidine  | [M-H]-   | C <sub>10</sub> H <sub>13</sub> N <sub>2</sub> O <sub>6</sub>                 | 257.0779         | -9.0             | 0.76          | 0.0115  |
| 302.534                  | UDP-N-acetylhexosamine             | [M-2H]2- | C <sub>17</sub> H <sub>25</sub> N <sub>3</sub> O <sub>17</sub> P <sub>2</sub> | 605.0659         | 0.5              | 0.64          | 0.0390  |
| 323.029                  | Uridine monophosphate              | [M-H]-   | C <sub>9</sub> H <sub>12</sub> N <sub>2</sub> O <sub>9</sub> P                | 323.0286         | 0.7              | 0.72          | 0.0186  |
| 324.094                  | N-Glycolylneuraminic acid          | [M-H]-   | C <sub>11</sub> H <sub>18</sub> NO <sub>10</sub>                              | 324.0936         | 0.7              | 0.63          | 0.0459  |
| 325.126                  | Asn-Gly-His                        | [M-H]-   | C <sub>12</sub> H <sub>17</sub> N <sub>6</sub> O <sub>5</sub>                 | 325.1266         | -3.5             | 1.31          | 0.0000  |

|                                                        |                            |         |                                                                               |          |      |      |        |
|--------------------------------------------------------|----------------------------|---------|-------------------------------------------------------------------------------|----------|------|------|--------|
| 333.060                                                | Glycerophosphoinositol     | [M-H]-  | C <sub>9</sub> H <sub>18</sub> O <sub>11</sub> P                              | 333.0592 | 1.4  | 0.65 | 0.0390 |
| 346.056                                                | Adenosine monophosphate    | [M-H]-  | C <sub>10</sub> H <sub>13</sub> N <sub>5</sub> O <sub>7</sub> P               | 346.0558 | 0.5  | 1.04 | 0.0000 |
| 362.051                                                | Guanosine monophosphate    | [M-H]-  | C <sub>10</sub> H <sub>13</sub> N <sub>5</sub> O <sub>8</sub> P               | 362.0507 | 1.0  | 0.61 | 0.0459 |
| 389.131                                                | Asn-Glu-Glu<br>Asp-Glu-Gln | [M-H]-  | C <sub>13</sub> H <sub>20</sub> N <sub>3</sub> O <sub>8</sub>                 | 389.1314 | -0.4 | 0.80 | 0.0000 |
| 606.075                                                | UDP-N-acetylhexosamine     | [M-H]-  | C <sub>17</sub> H <sub>26</sub> N <sub>3</sub> O <sub>17</sub> P <sub>2</sub> | 606.0743 | 0.5  | 0.85 | 0.0000 |
| <b>Fatty Acids (FA)</b>                                |                            |         |                                                                               |          |      |      |        |
| 363.211                                                | FA 22:6                    | [M+Cl]- | C <sub>22</sub> H <sub>32</sub> O <sub>2</sub> Cl                             | 363.2096 | 4.3  | 0.63 | 0.0459 |
| <b>Monoacylglycerols (MG) and Diacylglycerols (DG)</b> |                            |         |                                                                               |          |      |      |        |
| 421.312                                                | MG 20:0                    | [M+Cl]- | C <sub>23</sub> H <sub>46</sub> O <sub>4</sub> Cl                             | 421.309  | 5.9  | 0.68 | 0.0253 |
| 627.477                                                | DG 34:2                    | [M+Cl]- | C <sub>37</sub> H <sub>68</sub> O <sub>5</sub> Cl                             | 627.4761 | 1.0  | 0.75 | 0.0115 |
| 629.493                                                | DG 34:1                    | [M+Cl]- | C <sub>37</sub> H <sub>70</sub> O <sub>5</sub> Cl                             | 629.4917 | 2.1  | 1.19 | 0.0000 |
| 655.509                                                | DG 36:2                    | [M+Cl]- | C <sub>39</sub> H <sub>72</sub> O <sub>5</sub> Cl                             | 655.5074 | 2.2  | 0.89 | 0.0000 |

**Supplementary Table 2:** Metabolite species selected by SAM as significantly altered among control, Bev-resistant, and Bev-sensitive tissues (FDR < 5%) identified using DESI-MS imaging. Tentative attributions were assigned for each *m/z* value based on high mass accuracy and MS/MS measurements. For lipid species, X:Y refers to the fatty acid carbon chain length and number of double bonds, respectively.

| Measured <i>m/z</i>      | Tentative Attribution                                        | Adduct              | Proposed Formula                                                | Exact <i>m/z</i> | Mass Error (ppm) | SAM Score ( <i>d</i> ) | q-value |
|--------------------------|--------------------------------------------------------------|---------------------|-----------------------------------------------------------------|------------------|------------------|------------------------|---------|
| <b>Small Metabolites</b> |                                                              |                     |                                                                 |                  |                  |                        |         |
| 88.039                   | Alanine                                                      | [M-H] <sup>-</sup>  | C <sub>3</sub> H <sub>6</sub> NO <sub>2</sub>                   | 88.0404          | -12.5            | 1.32                   | 0.0149  |
| 96.968                   | Phosphoric acid                                              | [M-H] <sup>-</sup>  | H <sub>2</sub> O <sub>4</sub> P                                 | 96.9696          | -11.3            | 1.11                   | 0.0489  |
| 102.055                  | Aminobutyric acid                                            | [M-H] <sup>-</sup>  | C <sub>4</sub> H <sub>8</sub> NO <sub>2</sub>                   | 102.0561         | -10.8            | 1.82                   | 0.0000  |
| 115.002                  | Fumaric acid                                                 | [M-H] <sup>-</sup>  | C <sub>4</sub> H <sub>3</sub> O <sub>4</sub>                    | 115.0037         | -9.6             | 1.17                   | 0.0391  |
| 118.050                  | Threonine<br>Homoserine                                      | [M-H] <sup>-</sup>  | C <sub>4</sub> H <sub>8</sub> NO <sub>3</sub>                   | 118.051          | -9.3             | 1.98                   | 0.0000  |
| 119.034                  | Erythrose                                                    | [M-H] <sup>-</sup>  | C <sub>4</sub> H <sub>7</sub> O <sub>4</sub>                    | 119.035          | -9.2             | 1.19                   | 0.0324  |
| 125.000                  | Ethyl phosphate                                              | [M-H] <sup>-</sup>  | C <sub>4</sub> H <sub>6</sub> O <sub>4</sub> P                  | 125.0009         | -8.8             | 1.72                   | 0.0000  |
| 128.034                  | Pyroglutamic acid                                            | [M-H] <sup>-</sup>  | C <sub>5</sub> H <sub>6</sub> NO <sub>3</sub>                   | 128.0353         | -8.6             | 1.84                   | 0.0000  |
| 130.050                  | Glutamate semialdehyde<br>Hydroxyproline<br>Propionylglycine | [M-H] <sup>-</sup>  | C <sub>5</sub> H <sub>8</sub> NO <sub>3</sub>                   | 130.051          | -8.5             | 1.74                   | 0.0000  |
| 132.029                  | Aspartic acid                                                | [M-H] <sup>-</sup>  | C <sub>4</sub> H <sub>6</sub> NO <sub>4</sub>                   | 132.0302         | -8.3             | 1.93                   | 0.0000  |
| 135.030                  | Hypoxanthine                                                 | [M-H] <sup>-</sup>  | C <sub>5</sub> H <sub>3</sub> N <sub>4</sub> O                  | 135.0312         | -8.1             | 1.35                   | 0.0149  |
| 146.045                  | Glutamic acid                                                | [M-H] <sup>-</sup>  | C <sub>5</sub> H <sub>8</sub> NO <sub>4</sub>                   | 146.0459         | -7.5             | 1.40                   | 0.0149  |
| 151.025                  | Xanthine                                                     | [M-H] <sup>-</sup>  | C <sub>5</sub> H <sub>3</sub> N <sub>4</sub> O <sub>2</sub>     | 151.0262         | -7.3             | 1.72                   | 0.0000  |
| 167.020                  | Uric acid                                                    | [M-H] <sup>-</sup>  | C <sub>5</sub> H <sub>3</sub> N <sub>4</sub> O <sub>3</sub>     | 167.0211         | -7.2             | 1.51                   | 0.0112  |
| 174.040                  | N-Acetylaspartic acid                                        | [M-H] <sup>-</sup>  | C <sub>6</sub> H <sub>8</sub> NO <sub>5</sub>                   | 174.0408         | -5.2             | 2.13                   | 0.0000  |
| 175.024                  | Ascorbate                                                    | [M-H] <sup>-</sup>  | C <sub>6</sub> H <sub>7</sub> O <sub>6</sub>                    | 175.0248         | -5.7             | 1.39                   | 0.0149  |
| 179.055                  | Hexose                                                       | [M-H] <sup>-</sup>  | C <sub>6</sub> H <sub>11</sub> O <sub>6</sub>                   | 179.0561         | -4.5             | 1.73                   | 0.0000  |
| 182.058                  | Phosphocholine                                               | [M-H] <sup>-</sup>  | C <sub>5</sub> H <sub>13</sub> NO <sub>4</sub> P                | 182.0587         | -3.3             | 1.55                   | 0.0112  |
| 184.001                  | Phosphoserine                                                | [M-H] <sup>-</sup>  | C <sub>3</sub> H <sub>7</sub> NO <sub>6</sub> P                 | 184.0017         | -3.8             | 2.39                   | 0.0000  |
| 188.060                  | N-Acetylhistamine                                            | [M+Cl] <sup>-</sup> | C <sub>7</sub> H <sub>11</sub> N <sub>3</sub> OCl               | 188.0596         | 4.3              | 1.66                   | 0.0000  |
| 190.054                  | N-Acetylmethionine                                           | [M-H] <sup>-</sup>  | C <sub>7</sub> H <sub>12</sub> NO <sub>3</sub> S                | 190.0543         | -3.2             | 1.62                   | 0.0000  |
| 214.048                  | Hexosamine                                                   | [M+Cl] <sup>-</sup> | C <sub>6</sub> H <sub>13</sub> NO <sub>5</sub> Cl               | 214.0488         | -2.8             | 1.71                   | 0.0000  |
| 218.103                  | Pantothenic acid                                             | [M-H] <sup>-</sup>  | C <sub>9</sub> H <sub>16</sub> NO <sub>5</sub>                  | 218.1034         | -3.2             | 1.51                   | 0.0112  |
| 226.996                  | Citric acid                                                  | [M+Cl] <sup>-</sup> | C <sub>6</sub> H <sub>8</sub> O <sub>7</sub> Cl                 | 226.9964         | -2.2             | 1.17                   | 0.0391  |
| 236.021                  | Cysteinossuccinic acid                                       | [M-H] <sup>-</sup>  | C <sub>7</sub> H <sub>10</sub> NO <sub>6</sub> S                | 236.0234         | -11.9            | 2.16                   | 0.0000  |
| 241.012                  | Homocitric acid                                              | [M+Cl] <sup>-</sup> | C <sub>7</sub> H <sub>10</sub> O <sub>7</sub> Cl                | 241.0121         | -2.1             | 1.10                   | 0.0489  |
| 245.043                  | Glycerophosphoglycerol                                       | [M-H] <sup>-</sup>  | C <sub>6</sub> H <sub>14</sub> O <sub>8</sub> P                 | 245.0432         | -1.6             | 1.16                   | 0.0391  |
| 256.059                  | N-acetylhexosamine                                           | [M+Cl] <sup>-</sup> | C <sub>8</sub> H <sub>15</sub> NO <sub>6</sub> Cl               | 256.0593         | -0.8             | 1.15                   | 0.0391  |
| 268.104                  | Asn-His                                                      | [M-H] <sup>-</sup>  | C <sub>10</sub> H <sub>14</sub> N <sub>5</sub> O <sub>4</sub>   | 268.1051         | -4.5             | 1.65                   | 0.0000  |
| 276.085                  | Asn-Glu                                                      | [M-H] <sup>-</sup>  | C <sub>9</sub> H <sub>14</sub> N <sub>3</sub> O <sub>7</sub>    | 276.0837         | 4.7              | 1.51                   | 0.0112  |
| 289.116                  | Arginossuccinic acid                                         | [M-H] <sup>-</sup>  | C <sub>10</sub> H <sub>17</sub> N <sub>4</sub> O <sub>6</sub>   | 289.1154         | 0.7              | 1.61                   | 0.0000  |
| 298.114                  | Gly-His-Ser                                                  | [M-H] <sup>-</sup>  | C <sub>11</sub> H <sub>16</sub> N <sub>5</sub> O <sub>5</sub>   | 298.1157         | -4.7             | 2.79                   | 0.0000  |
| 306.076                  | Glutathione                                                  | [M-H] <sup>-</sup>  | C <sub>10</sub> H <sub>16</sub> N <sub>3</sub> O <sub>6</sub> S | 306.0765         | -0.3             | 2.02                   | 0.0000  |



|                                                        |                            |                     |                                                                  |          |      |      |        |
|--------------------------------------------------------|----------------------------|---------------------|------------------------------------------------------------------|----------|------|------|--------|
| 308.099                                                | N-Acetylneuraminic acid    | [M-H] <sup>-</sup>  | C <sub>11</sub> H <sub>18</sub> NO <sub>9</sub>                  | 308.0987 | -0.6 | 1.52 | 0.0112 |
| 324.094                                                | N-Glycolylneuraminic acid  | [M-H] <sup>-</sup>  | C <sub>11</sub> H <sub>18</sub> NO <sub>10</sub>                 | 324.0936 | 0.0  | 1.29 | 0.0225 |
| 325.125                                                | Asn-Gly-His                | [M-H] <sup>-</sup>  | C <sub>12</sub> H <sub>17</sub> N <sub>6</sub> O <sub>5</sub>    | 325.1266 | -4.6 | 1.13 | 0.0391 |
| 346.127                                                | Ala-Glu-Glu<br>Asp-Glu-Gln | [M-H] <sup>-</sup>  | C <sub>13</sub> H <sub>20</sub> N <sub>3</sub> O <sub>8</sub>    | 346.1256 | 4.6  | 1.25 | 0.0324 |
| 362.121                                                | Asp-Glu-Thr                | [M-H] <sup>-</sup>  | C <sub>13</sub> H <sub>20</sub> N <sub>3</sub> O <sub>9</sub>    | 362.1205 | 0.0  | 1.67 | 0.0000 |
| 328.107                                                | Gln-Phe                    | [M+Cl] <sup>-</sup> | C <sub>14</sub> H <sub>19</sub> N <sub>3</sub> O <sub>4</sub> Cl | 328.107  | 0.3  | 1.37 | 0.0149 |
| <b>Fatty Acids (FA)</b>                                |                            |                     |                                                                  |          |      |      |        |
| 301.217                                                | FA 20:5                    | [M-H] <sup>-</sup>  | C <sub>20</sub> H <sub>29</sub> O <sub>2</sub>                   | 301.2173 | -0.3 | 1.15 | 0.0391 |
| 319.240                                                | FA 18:0                    | [M+Cl] <sup>-</sup> | C <sub>18</sub> H <sub>36</sub> O <sub>2</sub> Cl                | 319.2409 | -2.8 | 1.15 | 0.0391 |
| 339.209                                                | FA 20:4                    | [M+Cl] <sup>-</sup> | C <sub>20</sub> H <sub>32</sub> O <sub>2</sub> Cl                | 339.2096 | -1.8 | 1.20 | 0.0324 |
| 363.210                                                | FA 22:6                    | [M+Cl] <sup>-</sup> | C <sub>22</sub> H <sub>32</sub> O <sub>2</sub> Cl                | 363.2096 | 1.4  | 1.21 | 0.0324 |
| 365.226                                                | FA 22:5                    | [M+Cl] <sup>-</sup> | C <sub>22</sub> H <sub>34</sub> O <sub>2</sub> Cl                | 365.2253 | 1.9  | 1.14 | 0.0391 |
| 391.245                                                | FA 24:6                    | [M+Cl] <sup>-</sup> | C <sub>24</sub> H <sub>36</sub> O <sub>2</sub> Cl                | 391.2409 | 11.0 | 1.11 | 0.0489 |
| <b>Monoacylglycerols (MG) and Diacylglycerols (DG)</b> |                            |                     |                                                                  |          |      |      |        |
| 365.246                                                | MG 16:0                    | [M+Cl] <sup>-</sup> | C <sub>19</sub> H <sub>38</sub> O <sub>4</sub> Cl                | 365.2464 | -0.3 | 1.32 | 0.0225 |
| 399.312                                                | DG 20:0                    | [M-H] <sup>-</sup>  | C <sub>23</sub> H <sub>43</sub> O <sub>5</sub>                   | 399.3116 | -0.3 | 1.16 | 0.0391 |
| 413.246                                                | MG 20:4                    | [M+Cl] <sup>-</sup> | C <sub>23</sub> H <sub>38</sub> O <sub>4</sub> Cl                | 413.2464 | 0.0  | 1.32 | 0.0149 |
| 437.246                                                | MG 22:6                    | [M+Cl] <sup>-</sup> | C <sub>25</sub> H <sub>38</sub> O <sub>4</sub> Cl                | 437.2464 | -0.5 | 1.23 | 0.0324 |
| 439.261                                                | MG 22:5                    | [M+Cl] <sup>-</sup> | C <sub>25</sub> H <sub>40</sub> O <sub>4</sub> Cl                | 439.2621 | -1.6 | 1.26 | 0.0225 |
